# Supplementary material for: Biallelic variants in MESD, which encodes a WNT-signaling-related protein, in four new families with recessively inherited osteogenesis imperfecta
Source: PubMed Central journal article supplement — HGG Adv. 2021 Aug 20;2(4):100051. doi: 10.1016/j.xhgg.2021.100051 (PMC8756491; doi:10.1016/j.xhgg.2021.100051), 2021-08-20
Supplement: mmc1.pdf [file mmc1.pdf]

**Supplemental information**

**Biallelic variants in *MESD*, which encodes  
a WNT-signaling-related protein, in four new families  
with recessively inherited osteogenesis imperfecta**

**Thao T. Tran, Rachel B. Keller, Brecht Guillemyn, Melanie Pepin, Jane E. Corteville, Samir Khatib, Mohammad-Sadegh Fallah, Sirous Zeinali, Fransiska Malfait, Sofie Symoens, Paul Coucke, Peter Witters, Elena Levtchenko, Hamideh Bagherian, Deborah A. Nickerson, Michael J. Bamshad, Jessica X. Chong, University of Washington Center for Mendelian Genomics, and Peter H. Byers**

## SUPPLEMENTARY MATERIAL & METHODS

**Informed Consent:** Written informed consent was obtained for all individuals in this study.

**Exome filtering:** In order to identify the causative gene in Family 1, we used the same WES data set described by Pyott *et al.*<sup>5</sup> which included five unrelated infants with OI phenotypes and the unaffected sibling of one of them. This data set was used to identify one of the first families in which *WNT1* [MIM 164820] pathogenic variants were shown to cause OI.<sup>5</sup> In all five families represented, the affected infant was from a recurrent sibling set. Four of the families were thought to be consanguineous and the fifth was from a defined ethnic community. In the included sibling pair, the affected child was found to be homozygous for a missense variant in *WNT1*.<sup>5</sup> Separately, another infant in the group was found to have a homozygous 20 kilobase deletion that encompassed exon 4 of *TMEM38B* [MIM 611236] and flanking splice sites. Prior to this analysis, the specific *TMEM38B* deletion had been described in other infants from the same population.<sup>6</sup> The exome sequence data had no coverage in the region of exon 4 of *TMEM38B*, which confirmed the deletion.

We took two approaches to the data analysis. The first was to repeat the method described by Pyott *et al.*<sup>5</sup> using one of the unsolved infants from a consanguineous family in the previously described dataset (1-II:6) (Figure 3C) as the unknown. Briefly, we filtered the WES data for variants matching the expected homozygous recessive pattern of inheritance. We used the other three infants in the dataset (unaffected, *WNT1*, and *TMEM38B*) as “unaffected” controls and assumed that none of the remaining infants shared a causative variant. The analysis identified 55,915 variants from the reference exome seen in one or more of the individuals who were sequenced. We removed variants found in 1-II:6 that were also found in the other three individuals which left 9198 variants. Removal of intergenic

variants and those that appeared more than 10 times in the Exome Sequencing Project Exome Variant Server (EVS) left 936 variants. All heterozygous variants were discarded, as the family history suggested homozygous recessive inheritance, which left 123 variants. After intronic variants and synonymous coding variants were discarded, there were 62 candidates left. Those variants with a conservation score (consScoreGERP)  $>2$  were discarded, leaving 24 variants. Of the 24, 11 genes were identified as potential candidates based on allele frequencies in the ExAC database (Supplemental Table 2).

For the second approach, the WES data were annotated with the Variant Effect Predictor v89<sup>7</sup> and analyzed with GEMINI 0.20.2.<sup>7</sup> We first checked for predicted pathogenic variants in all genes known to underlie OI.<sup>2</sup> We then focused on the same highly consanguineous family (Figure 2; Family 1), and filtered the WES data for variants that matched the expected homozygous recessive pattern of inheritance. Variants unlikely to impact protein-coding sequence (for which GEMINI impact\_severity = LOW), variants filter flagged by the Genome Analysis Toolkit (GATK) as low quality (quality score  $\leq 30$ , long homopolymer run  $> 5$ , low quality by depth  $< 5$ , within a cluster of SNPs), and variants with an alternative allele frequency  $>0.0005$  in any superpopulation in gnomAD (v2.0), the Exome Variant Server (EVS), 1000 Genomes (phase 3 release), or  $>0.05$  in an internal database of  $\sim 6400$  individuals were excluded. Individual genotypes with depth  $< 6$  or genotype quality  $< 20$  were treated as missing in analysis. Due to the severity of OI in this family, we excluded all variants that were found in the homozygous state in the gnomAD database as gnomAD contains only putatively healthy adults. This yielded twenty candidate genes.

**Genomic & cDNA Sequencing:** DNA was extracted from patient fibroblasts or blood using the DNeasy Blood & Tissue Kit (Qiagen). RNA was extracted from patient fibroblasts using the RNeasy Mini Kit (Qiagen) and cDNA was generated with the Superscript First Strand

Synthesis System (ThermoFisher Scientific). For confirmatory sequencing of *MESD*, exon 3 was amplified from either genomic DNA or cDNA using AmpliTaq Gold Polymerase (Applied Biosystems). The cycling program was: 95°C for 12 minutes, 95 °C for 10 seconds, 61 °C for 40 seconds, 72 °C for 50 seconds for 35 cycles, then, 72 °C for 7 minutes. Amplicons were treated with ExoSAP according to a standard protocol. Sequencing reactions were assembled using Big Dye v3.1 (Applied Biosystems) with the following program: 96°C for 10 seconds, 50 °C for 5 seconds, 60°C for 4 minutes for 40 cycles. Sequencing was run on an ABI 3730. Sequences were analyzed using Mutation Surveyor v5.0 (Softgenetics). Primers used for genomic and cDNA sequencing of *MESD* were as follows: *MESD* Genomic Sense 5'-TGCTCTGACCCCTTAGCACC-3', *MESD* Genomic Antisense 5'- GGGCAAAGAGCTCTCCACG-3', *MESD* cDNA Sense 5'- GTCGGGTAAGCGCGTCTAGG-3', and *MESD* cDNA Antisense 5'-AAGAGCTCTCCACGTCCACC-3'.

**Immunoblotting:** Protein lysates were prepared from primary fibroblasts using a buffer containing 0.05M Tris-HCl at pH 8.0, 0.15M NaCl, 5mM EDTA, 1% NP-40, and a protease inhibitor cocktail at 4 °C. 50µg of lysate was loaded per lane and resolved on a 10% SDS-PAGE gel in loading buffer containing 7.7 mg/ml dithiothreitol (DTT). Proteins were transferred to an Amersham Protran Premium 0.45µm Nitrocellulose Membrane (GE Healthcare). Detection for western blot was performed with primary antibodies for *MESD* (sc-139397; Santa Cruz Biotechnology, Inc.) at 1:100, *LRP5* (sc-390267; Santa Cruz Biotechnology, Inc.) at 1:200, *LRP6* (sc-25317; Santa Cruz Biotechnology, Inc.) at 1:300, and *GAPDH* (ab179811; Abcam) at 1:100. Detection was achieved using Amersham ECL Western Blotting Detection Reagent (GE Healthcare).

**In Vitro Transcription/Translation (IVTT):** In vitro transcription/translation (IVTT) was achieved using the 1-Step Human Coupled IVT Kit–DNA (ThermoFisher Scientific). Templates for IVTT were generated from an *MESD* cDNA expression plasmid (SC304244) from OriGene Technologies. Family-specific mutations were introduced into the *MESD* sequence using the QuikChange II Site-Directed Mutagenesis Kit (Agilent Technologies). Primers used for mutagenesis were:

QuikMESD\_603-606delTAAA\_F 5'-

caaaggaggaggaagcaaagagaaaaacaaagcaagacaa-3'; QuikMESD\_603-

606delTAAA\_R 5'- ttgtcttgctttgtttttctctttgcttctctcctttg-3';

QuikMESD\_632dupA\_F 5'- caaagcaagacaagggaacaaaaaagaaggaaggagatct-3';

QuikMESD\_632dupA\_R 5'- agatctccttctctttttttgccccttgcttgctttg-3';

QuikMESD\_c676t\_F 5'- ttattcccagctcaattttcttcttgaagaccgaga-3'; and

QuikMESD-c676t\_R 5'- tctcggcttccaaggaagaaaattgagctggaataa-3'.

Fragments containing the cDNA sequence with upstream T7 promoters were liberated using Sac-I (New England BioLabs) and gel purified using the QIAquick Gel Extraction Kit (Qiagen). Approximately 125ng of linearized template was used in IVTT reactions that were incubated for 6 hours at 30°C. 2microliters of each IVT reaction was run on a 10% SDS-PAGE gel in loading buffer containing 7.7 mg/ml dithiothreitol (DTT). Western Blot was performed using primary antibody against MESD (sc-139397; Santa Cruz Biotechnology, Inc.) at 1:100 followed by HRP-Conjugated Goat Anti-Rabbit IgH H&L (ab6721; Abcam) secondary antibody at 1:20,000. Detection was achieved using Amersham ECL Western Blotting Detection Reagent (GE Healthcare).

**Immunocytochemistry (ICC):** Primary dermal fibroblasts from I-II:6 and from a control patient (A8) cultured in DMEM 10% FBS were fixed in cold methanol for 10 minutes and incubated with 2.5% normal horse serum/PBS (Vector Laboratories) for 20 minutes at room temperature to block nonspecific binding of antibodies. The cells were incubated with primary antibody to MESD (sc-139397; Santa Cruz Biotechnology, Inc.) at 1/50 at 4°C overnight. This was followed by incubation with AlexaFluor488 Goat Anti-Rabbit IgH (H&L) (A11034; ThermoFisher Scientific), 1:500, at room temperature for 1 hour. This stepwise staining process was repeated for KDEL (ab176333; Abcam) at 1:100 with AlexaFluor594 Goat Anti-Rabbit IgH (H&L) (A11037; ThermoFisher Scientific) at 1:800. The cells were counterstained with DAPI and mounted on slides. Images were acquired with a Zeiss Imager A1.

## SUPPLEMENTARY TABLES AND FIGURES

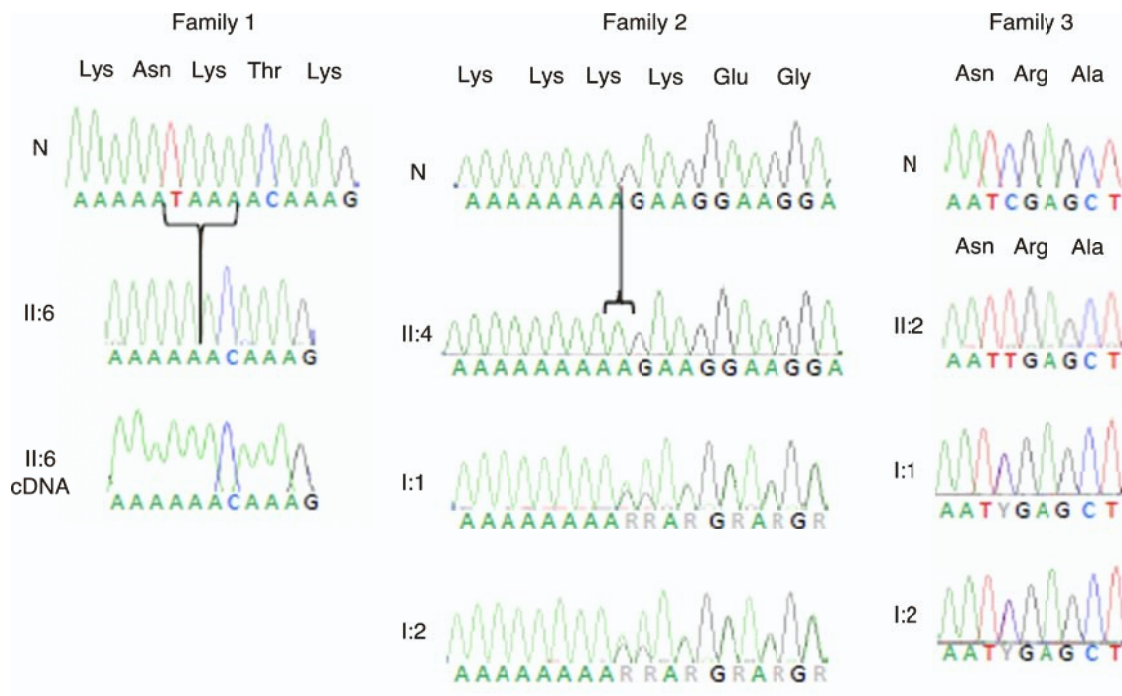

**Supplemental Figure 1. MESD confirmational sequencing.** Variant sequences from available family members confirming the homozygous small deletion (c.603-606delTAAA) in Family 1 (both in proband genomic DNA and cDNA), the duplication (c.632dupA) in Family 2 (in the homozygous proband and in both heterozygous parents), and the substitution mutation (c.676C>T) in Family 3 (in the homozygous proband and in both heterozygous parents)(the proband in Family 4 carries the same homozygous mutation). The normal reference sequence sequences are labeled 'N'.

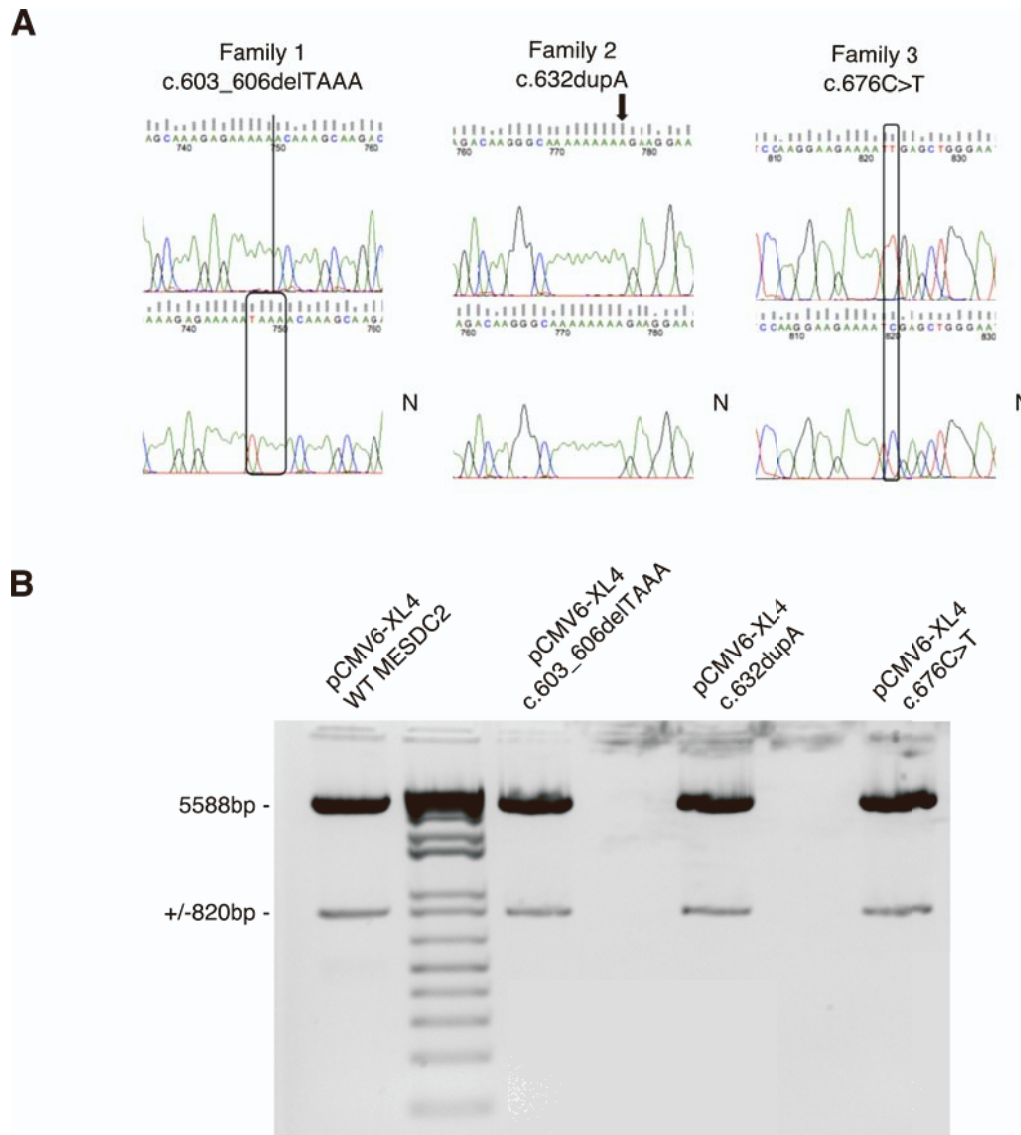

**Supplemental Figure 2. IVTT DNA Templates.** (A) Mutagenesis introducing family variants in MESD was confirmed by Sanger sequencing. The normal reference sequences are labeled 'N'. (B) Sac-I digestion of T7-MESD cDNA fragments away from pCMV6-XL4 expression plasmid backbone.



**Supplemental Table 1: Genes associated with OI.**

| <b>Gene Name</b> | <b>MIM</b> |
|------------------|------------|
| <i>COL1A1</i>    | MIM 120150 |
| <i>COL1A2</i>    | MIM 120160 |
| <i>IFITM5</i>    | MIM 614757 |
| <i>BMP1</i>      | MIM 112264 |
| <i>CREB3L1</i>   | MIM 616215 |
| <i>CRTAP</i>     | MIM 605497 |
| <i>FKBP10</i>    | MIM 607063 |
| <i>MBTPS2</i>    | MIM 300294 |
| <i>P3H1</i>      | MIM 610339 |
| <i>PLOD2</i>     | MIM 301865 |
| <i>PPIB</i>      | MIM 123841 |
| <i>SEC24D</i>    | MIM 607186 |
| <i>SERPINF1</i>  | MIM 172860 |
| <i>SERPINH1</i>  | MIM 600943 |
| <i>SP7</i>       | MIM 606633 |
| <i>SPARC</i>     | MIM 182120 |
| <i>TENT5A</i>    | MIM 611357 |
| <i>TMEM38B</i>   | MIM 611236 |
| <i>WNT1</i>      | MIM 164820 |
| <i>MESD</i>      | MIM 618644 |
| <i>CCDC134</i>   | ?          |
| <i>KDELRL2</i>   | MIM619131  |

**Supplemental Table 2. Candidate Genes From Exome Analysis. N/A = not available.**

| Chromosomal Location                         | Gene                            | Protein                                                                  | Coding Change | Protein Change | Alteration | Clinical Associations  |
|----------------------------------------------|---------------------------------|--------------------------------------------------------------------------|---------------|----------------|------------|------------------------|
| Chromosome 1:<br>66,533,383-<br>66,748,299   | <i>SGIP1</i><br>MIM<br>611540   | SH3-Domain GRB2-Like<br>(Endophilin)-Interacting<br>Protein 1<br>(SGIP1) | c.1199C>A     | p.Pro400His    | missense   | N/A                    |
| Chromosome 1:<br>205,042,937-<br>205,078,499 | <i>CNTN2</i><br>MIM<br>190197   | Contactin 2<br>(CNTN2)                                                   | c.2377C>T     | p.Arg793Cys    | missense   | epilepsy <sup>28</sup> |
| Chromosome 3:<br>126,006,355-<br>126,101,561 | <i>SLC41A3</i><br>MIM<br>610803 | Solute Carrier Family 41,<br>Member 3<br>(SLC41A3)                       | c.533G>A      | p.Ile178Thr    | missense   | N/A                    |

|             |               |                       |           |               |            |                                                        |
|-------------|---------------|-----------------------|-----------|---------------|------------|--------------------------------------------------------|
| Chromosome  | <i>PIANP</i>  | PILR-Alpha-Associated | c.214G>A  | p.Arg72Trp    | missense   | immune regulation ( <i>m. musculus</i> ) <sup>29</sup> |
| 12:         | MIM           | Neural Protein        |           |               |            |                                                        |
| 6,693,792-  | 616065        | (PANP)                |           |               |            |                                                        |
| 6,700,800   |               |                       |           |               |            |                                                        |
| Chromosome  | <i>HS6ST3</i> | Heparin Sulfate 6-O-  | c.688C>T  | p.Arg230Cys   | missense   | N/A                                                    |
| 13:         | MIM           | Sulfotransferase 3    |           |               |            |                                                        |
| 96,090,839- | 609401        | (HS6ST3)              |           |               |            |                                                        |
| 96,839,562  |               |                       |           |               |            |                                                        |
| Chromosome  | <i>EXOC5</i>  | SEC10-Like 1          | c.2074C>T | p.Val692Ile   | missense   | N/A                                                    |
| 14:         | MIM           | (SEC10L1)             |           |               |            |                                                        |
| 57,200,507- | 604469        |                       |           |               |            |                                                        |
| 57,269,008  |               |                       |           |               |            |                                                        |
| Chromosome  | <i>MESD</i>   | Mesoderm Development  | c.603-    | p.Asn201Lysfs | frameshift | failure to form mesoderm, patterning                   |
| 15:         | MIM           | Gene                  | 606delTAA | *15           |            | defects, embryonic lethality ( <i>m.</i>               |
| 80,946,289- | 607783        | (MESD)                |           |               |            | <i>musculus</i> ) <sup>9; 14</sup>                     |

80,989,878

|                                                |                               |                                                                        |           |             |          |                                                                                                 |
|------------------------------------------------|-------------------------------|------------------------------------------------------------------------|-----------|-------------|----------|-------------------------------------------------------------------------------------------------|
| Chromosome<br>17:<br>7,839,904-<br>7,854,796   | <i>KDM6B</i><br>MIM<br>611577 | Jumonji Domain-<br>Containing Protein 3<br>(JMJD3)                     | c.1825G>A | p.Ala609Thr | missense | Mental Retardation, Autosomal<br>Recessive 33 [MIM 614341] (not<br>confirmed) <sup>30; 31</sup> |
| Chromosome<br>19:<br>11,834,341-<br>11,419,342 | <i>RGL3</i><br>MIM<br>616473  | Ral Guanine Nucleotide<br>Dissociation Stimulator-<br>Like 3<br>(RGL3) | c.1046G>T | p.Ala349Asp | missense | N/A                                                                                             |
| Chromosome<br>19:<br>49,766,968-<br>49,807,113 | <i>AP2A1</i><br>MIM<br>601026 | Clathrin Adaptor<br>Complex AP2, Alpha<br>Subunit<br>(AP2-Alpha)       | c.2063G>T | p.Gly688Val | missense | N/A                                                                                             |
